# Supplementary material for: Impact of iodide ions on the speciation of radiolytic transients in molten LiCl–KCl eutectic salt mixtures
Source: Royal Society of Chemistry journal article supplement (doi:10.1039/d3cp01477k), 2023-01-01
Supplement: d3cp01477k1.pdf [file d3cp01477k1.pdf]

## Supplementary Information: Impact of Iodide Ions on the Speciation of Radiolytic Transients in Molten LiCl-KCl Eutectic Salt Mixtures

Jacy K. Conrad,<sup>a\*</sup> Kazuhiro Iwamatsu,<sup>b</sup> Michael E. Woods,<sup>c</sup> Ruchi Gakhar,<sup>c</sup> Bobby Layne,<sup>b</sup> Andrew R. Cook,<sup>b</sup> and Gregory P. Horne<sup>a\*</sup>

<sup>a</sup> *Center for Radiation Chemistry Research, Idaho National Laboratory, Idaho Falls, ID, P.O. Box 1625, 83415, USA.*

<sup>b</sup> *Department of Chemistry, Brookhaven National Laboratory, Upton, New York, 11973, USA.*

<sup>c</sup> *Advanced Technology of Molten Salts, Idaho National Laboratory, Idaho Falls, ID, P.O. Box 1625, 83415, USA.*

\*Corresponding authors. E-mail: [jacy.conrad@inl.gov](mailto:jacy.conrad@inl.gov) and [gregory.horne@inl.gov](mailto:gregory.horne@inl.gov).

### ORCID

|                   |                     |
|-------------------|---------------------|
| Jacy K. Conrad    | 0000-0002-0745-588X |
| Kazuhiro Iwamatsu | 0000-0002-5977-6896 |
| Michael E. Woods  | 0000-0001-8685-6026 |
| Ruchi Gakhar      | 0000-0002-7103-1256 |
| Bobby Layne       | 0000-0002-1225-3596 |
| Andrew R. Cook    | 0000-0001-6633-3447 |
| Gregory P. Horne  | 0000-0003-0596-0660 |

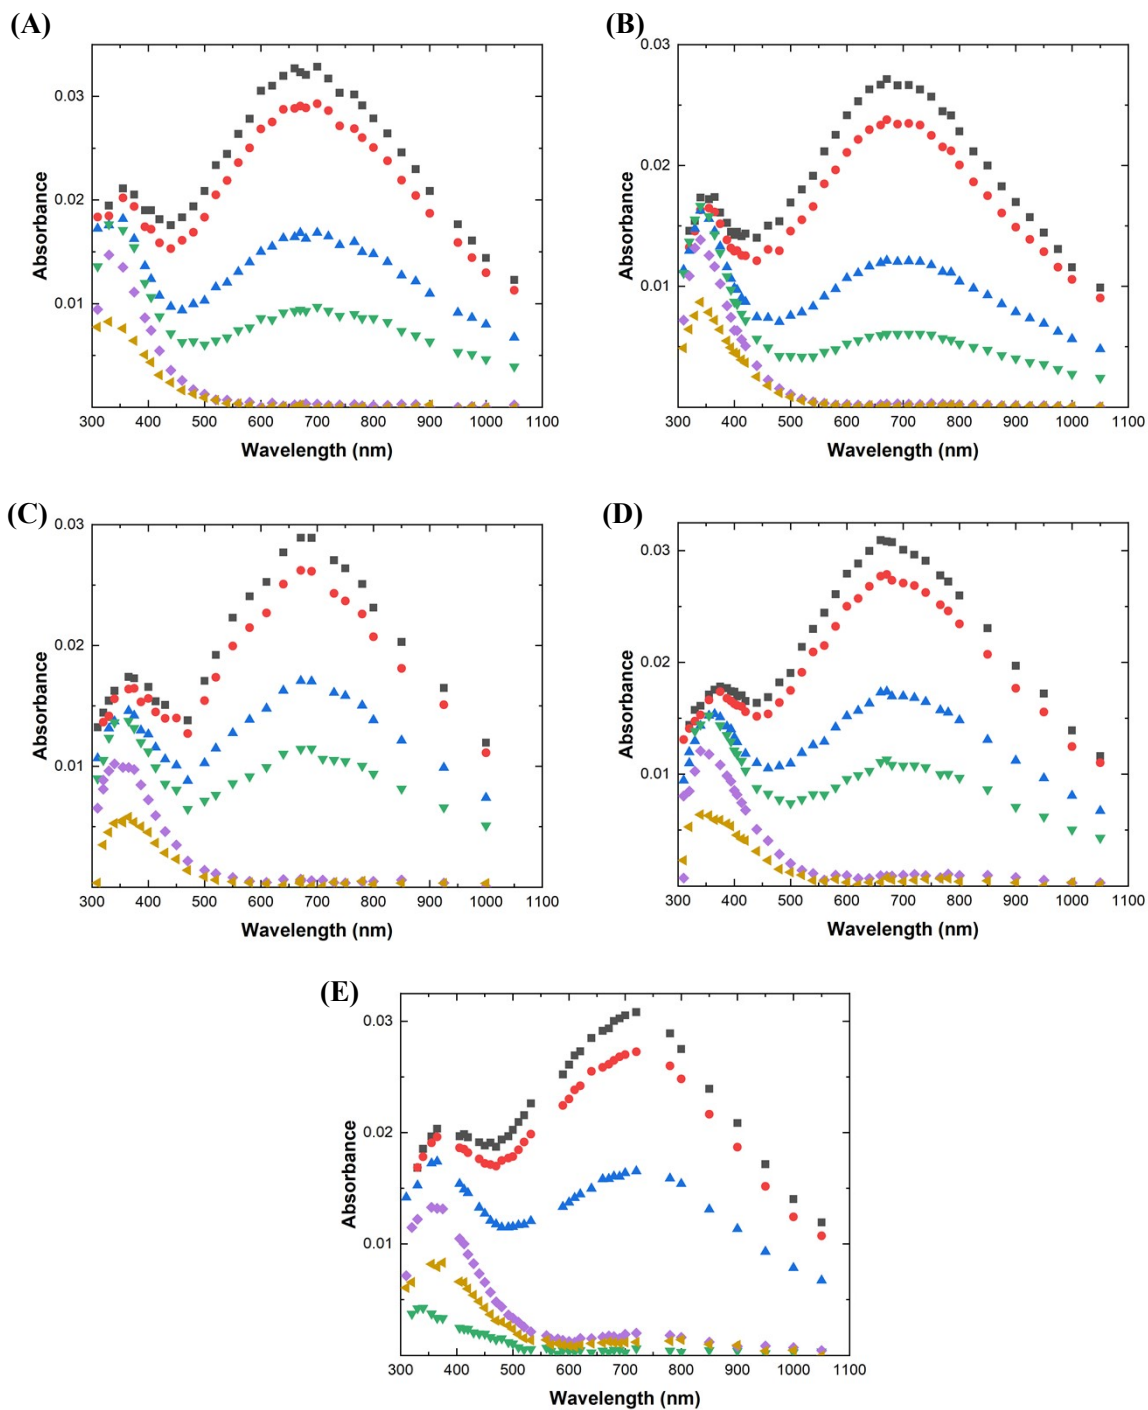

**Fig. S1.** Transient absorption spectra from the electron pulse irradiation of 0.054 (A), 0.107 (B), 0.536 (C), 1.072 (D), and 5.107 (E) wt.% KI in LiCl-KCl eutectic at 400 °C for 5 ns (■), 10 ns (●), 50 ns (□), 100 ns (▼), 1 μs (◆), and 5 μs (◇) normalized by the absorbed dose.

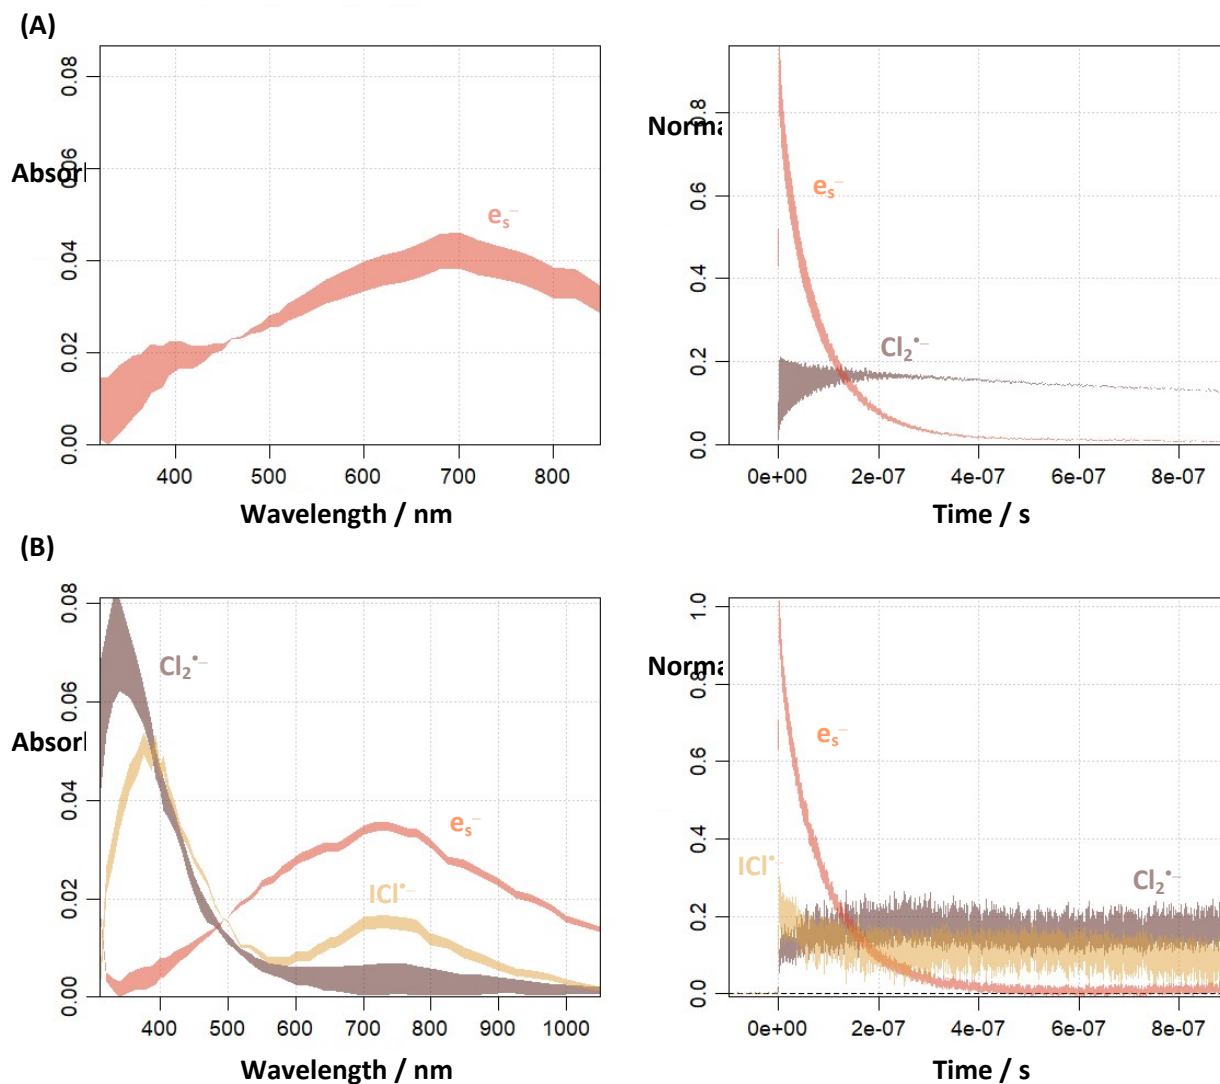

**Fig. S2.** Ambiguity plots for the kinetics and spectral shapes displayed with equal areas from *SK-Ana* deconvolution of the electron pulse irradiation of neat LiCl-KCl eutectic (A) and 10 wt.% KI in LiCl-KCl eutectic (B) at 400 °C up to 1  $\mu$ s. These correspond to the best fit plots given in Fig. 2 in the manuscript.

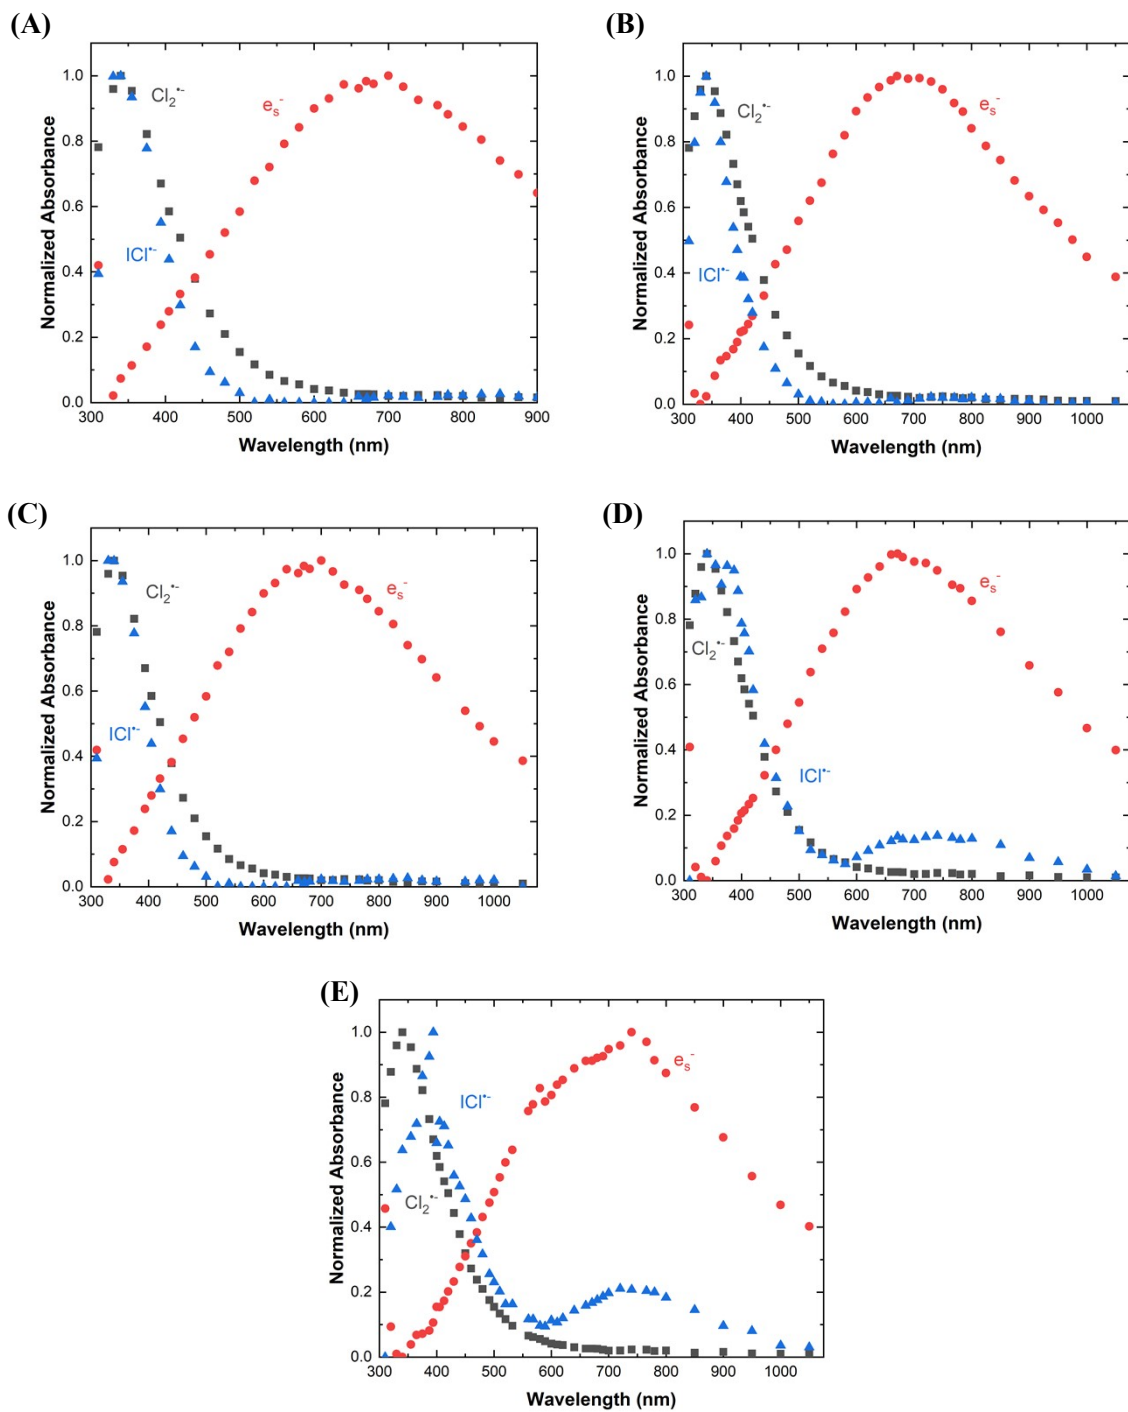

**Fig. S3.** Normalized spectra from *SK-Ana* deconvolution of the electron pulse irradiation of 0.054 (A), 0.107 (B), 0.536 (C), 1.072 (D), and 5.107 (E) wt.% KI in LiCl-KCl eutectic at 400 °C up to 1  $\mu$ s.

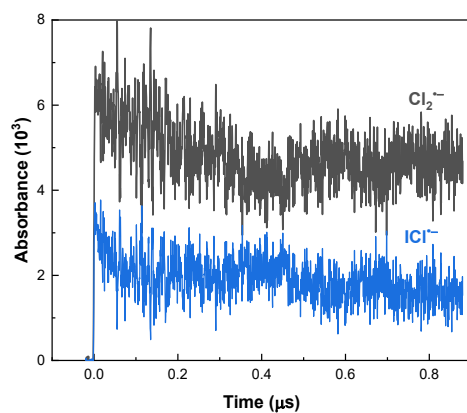

**Fig. S4.** Deconvoluted kinetic traces after electron pulse irradiation of 10 wt.% KI in LiCl-KCl eutectic with 2 wt.% ZnCl<sub>2</sub> at 400 °C.

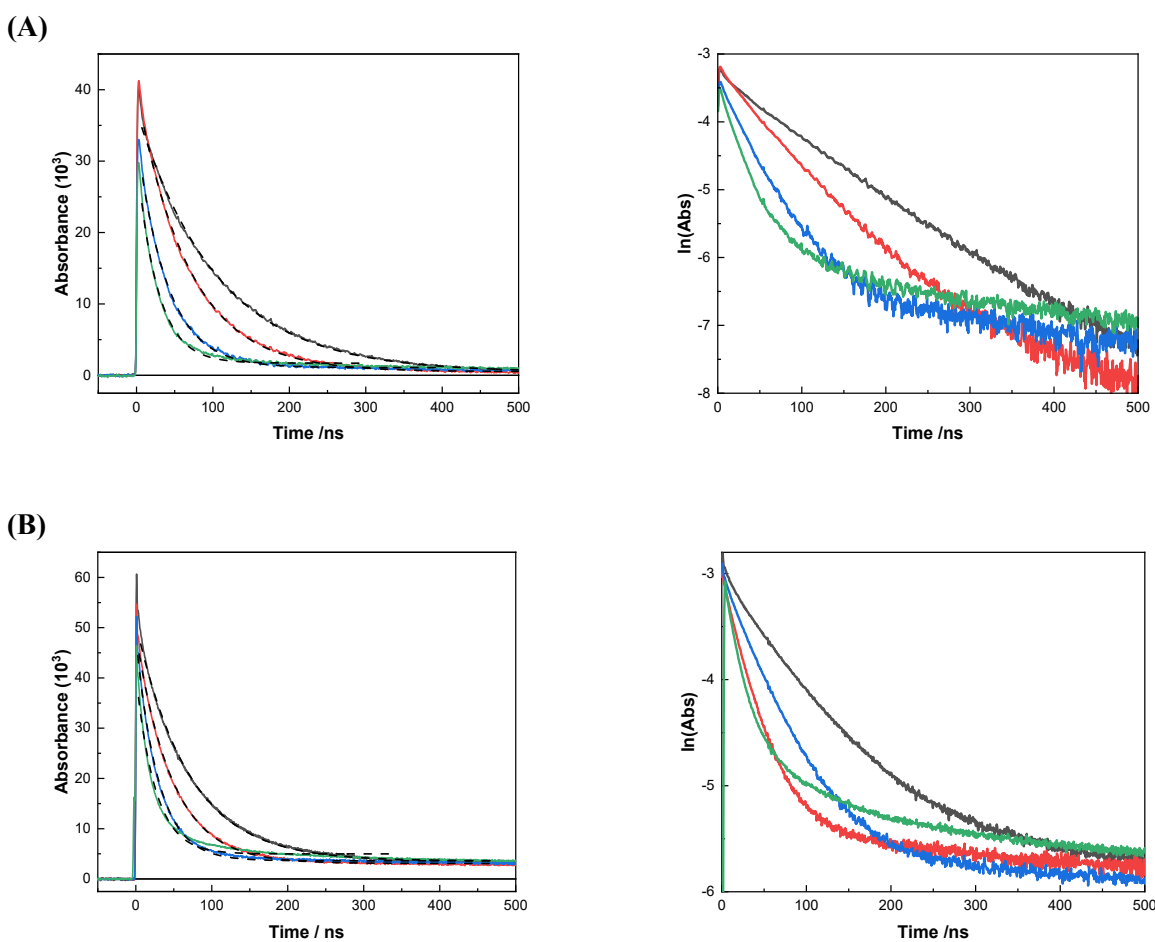

**Fig. S5.** Dose corrected absorbances at 671 nm and the natural logarithm of those absorbances as a function of time from 0–500 ns demonstrating the decay of the e<sub>s</sub><sup>-</sup> after the electron pulse irradiation of (A) LiCl-KCl eutectic and (B) 9.998 wt.% KI in LiCl-KCl eutectic at 400 (—), 500 (—), 600 (—), and 700 (—) °C.

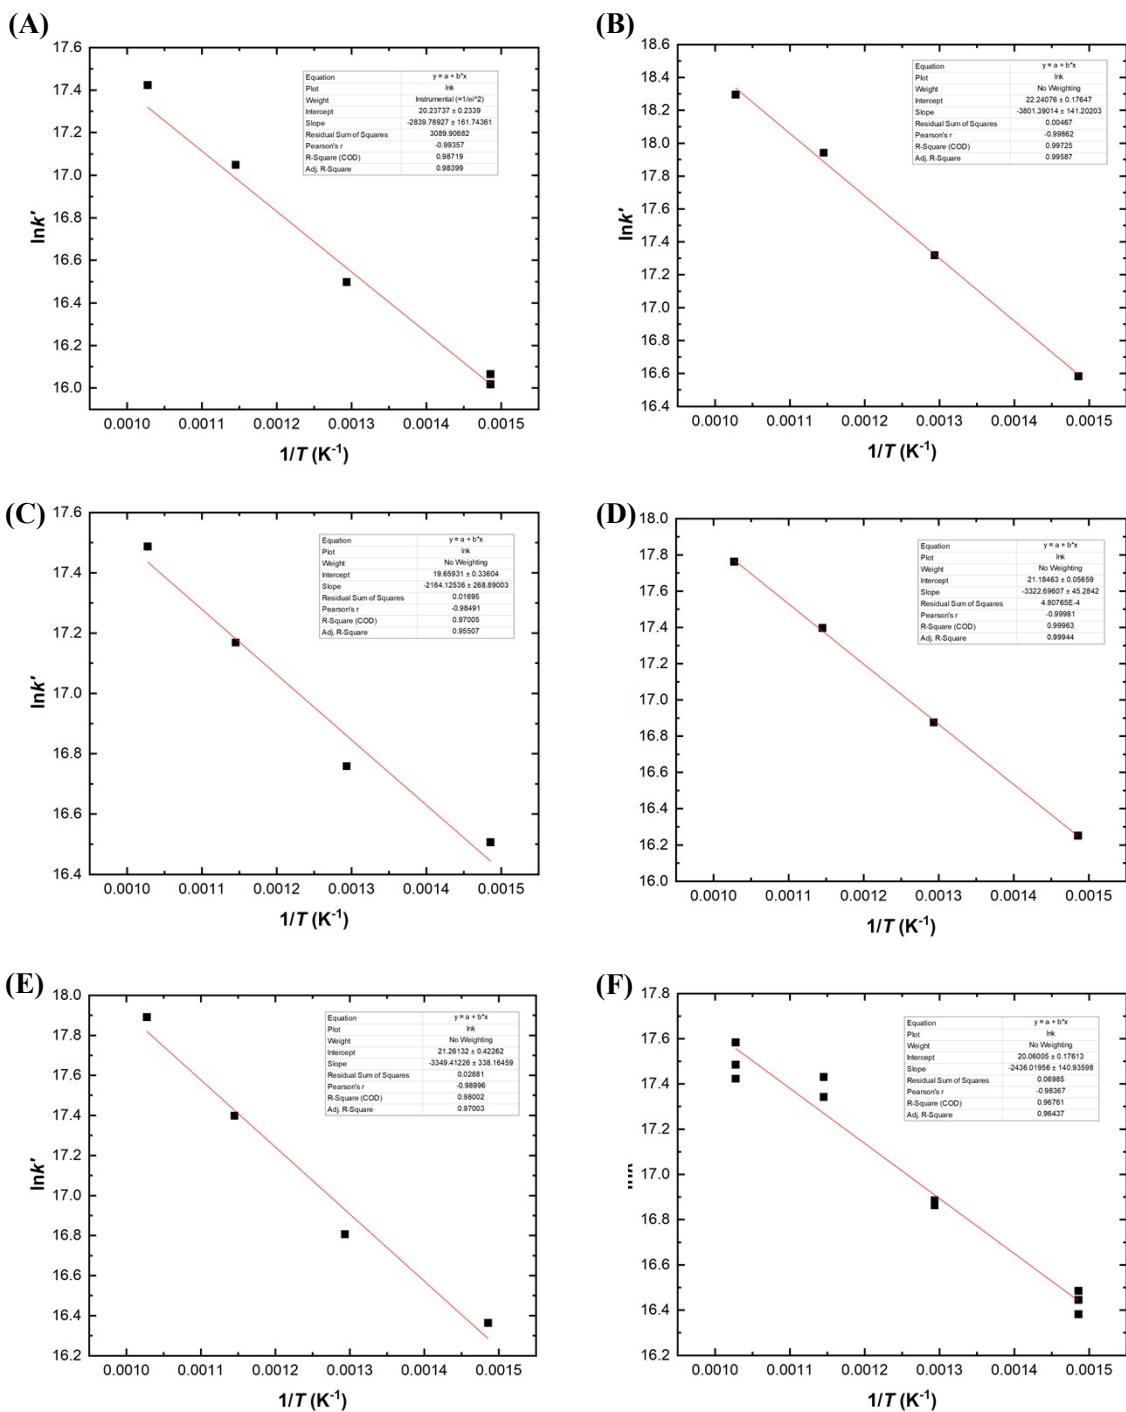

**Fig. S6.** Plot of the natural logarithm of the pseudo-first-order fits to solvated electron decay vs. the inverse temperature for 0.000 (A), 0.107 (B), 0.536 (C), 1.072 (D), 5.107 (E), and 9.998 (F) wt.% KI in LiCl-KCl molten eutectic.

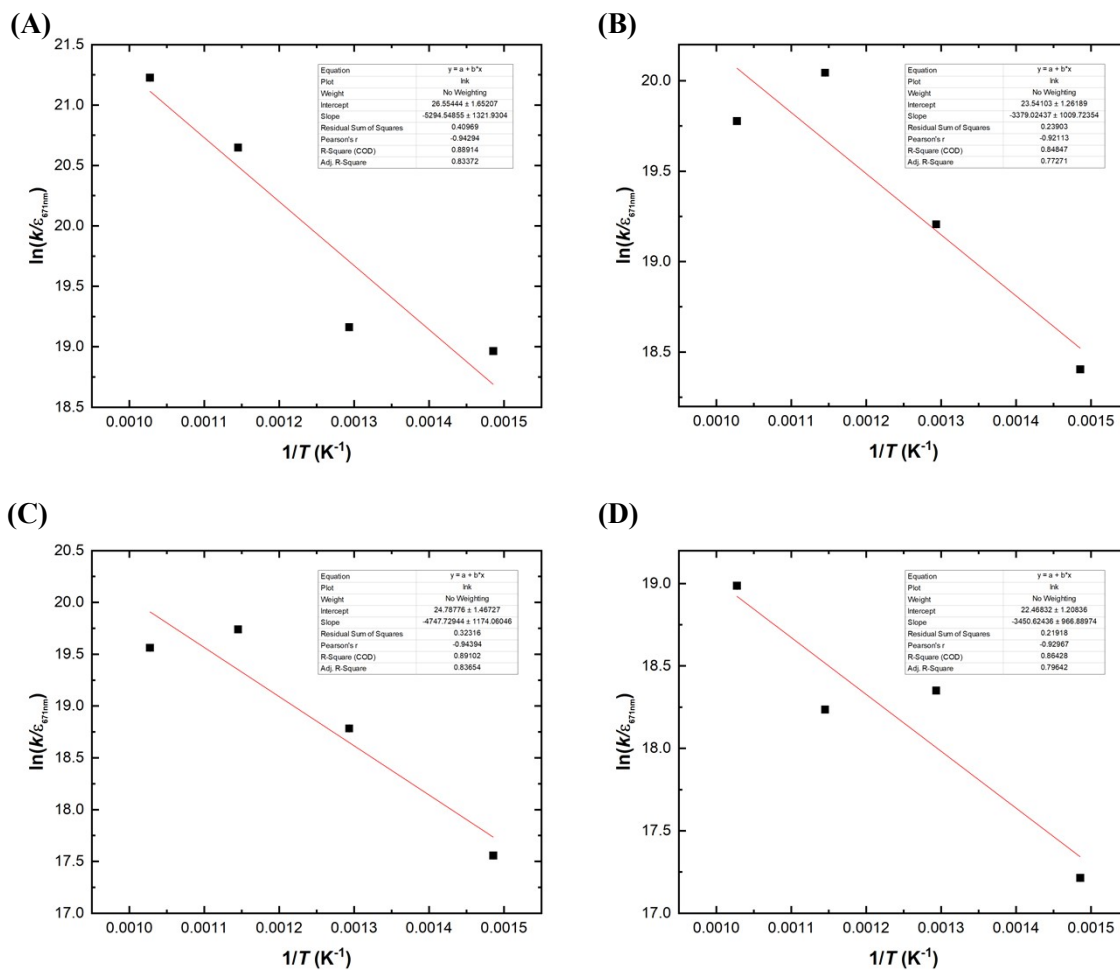

**Fig. S7.** Plot of the natural logarithm of the fitted  $k/\epsilon_{671nm}$  for the  $ICl^-$  radical cation decay vs. the inverse temperature for 0.107 (A), 0.536 (B), 1.072 (C), and 5.107 (D) wt.% KI in LiCl-KCl molten eutectic.

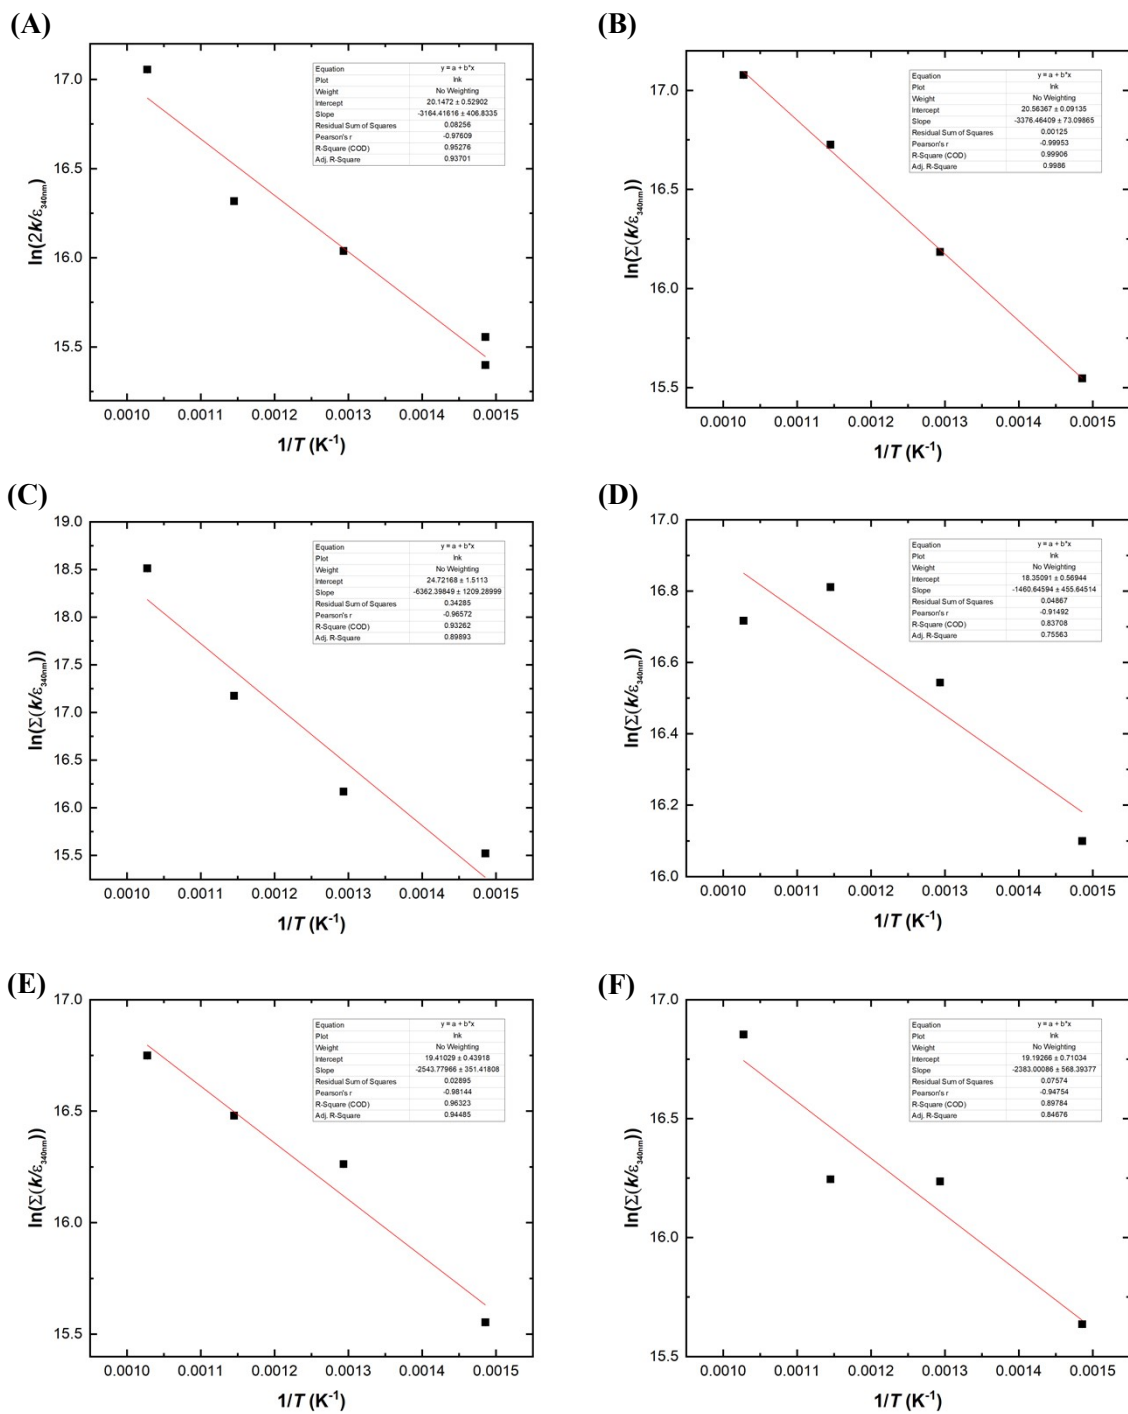

**Fig. S8.** Arrhenius plots for the overall second-order fits of the combined  $\text{Cl}_2^-$  and  $\text{ICl}^-$  radical decay vs. the inverse temperature for 0.000 (A), 0.054 (B), 0.107 (C), 0.536 (D), 1.072 (E), and 5.107 (F) wt.% KI in LiCl-KCl eutectic at 340 nm.



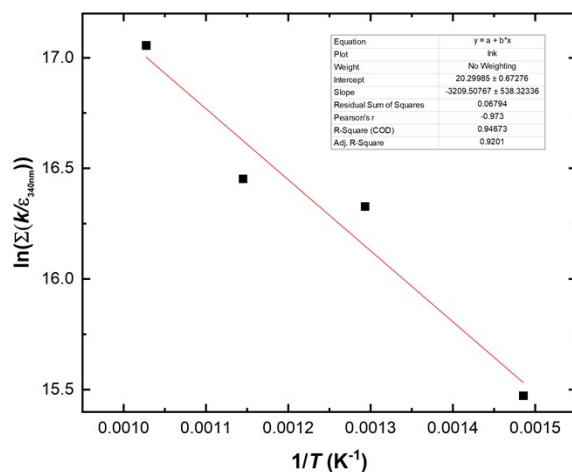

**Fig. S9.** Arrhenius plots for the overall second-order fits of the combined  $\text{Cl}_2^{\cdot-}$  and  $\text{ICl}^{\cdot-}$  radical decay vs the inverse temperature for 5.107 wt.% KI in LiCl-KCl eutectic at 400 nm.

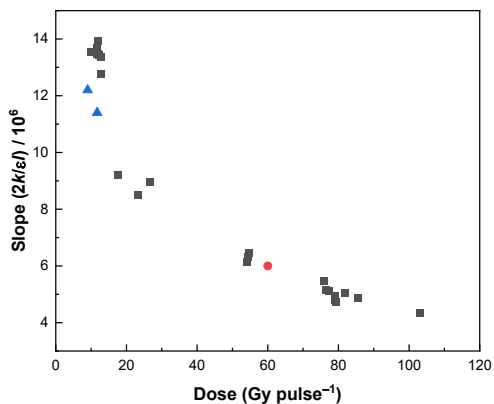

**Fig. S10.**  $\text{Cl}_2^{\cdot-}$  radical anion decay rate ( $2k/\epsilon t$ ) vs. the dose per pulse after the electron pulse irradiation of neat LiCl-KCl eutectic from: this work ( $\square$ ), Iwamatsu *et al.* ( $\blacksquare$ ), and Hagiwara *et al.* ( $\bullet$ ).

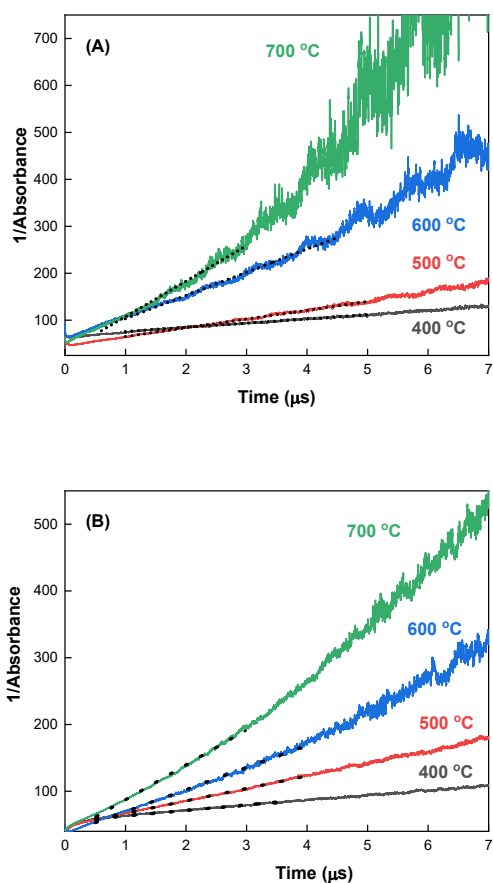

**Fig. S11.** The fitted inverse absorbance at 340 nm (A) and 400 nm (B) after the electron pulse irradiation of 10 wt.% KI in LiCl-KCl eutectic at 400 (—), 500 (—), 600 (—), and 700 (—) °C.

**Table S1.** Fitted pseudo-first-order rate coefficients for the decay of the solvated electron at 671 nm.

| [KI] (wt.%) | Pseudo-first-order rate coefficients for the $e_s^-$ decay at 671 nm ( $k^{\prime} / 10^7 \text{ s}^{-1}$ ) |                   |                   |                 |
|-------------|-------------------------------------------------------------------------------------------------------------|-------------------|-------------------|-----------------|
|             | 400 °C                                                                                                      | 500 °C            | 600 °C            | 700 °C          |
| 0.000       | $0.909 \pm 0.001$                                                                                           | $1.462 \pm 0.002$ | $2.536 \pm 0.007$ | $3.69 \pm 0.02$ |
| 0.054       | $1.287 \pm 0.003$                                                                                           | $2.518 \pm 0.006$ | $4.30 \pm 0.02$   | $6.08 \pm 0.07$ |
| 0.107       | $1.591 \pm 0.003$                                                                                           | $3.32 \pm 0.01$   | $6.20 \pm 0.03$   | $8.8 \pm 0.1$   |
| 0.536       | $1.474 \pm 0.003$                                                                                           | $1.898 \pm 0.004$ | $2.859 \pm 0.009$ | $3.93 \pm 0.03$ |
| 1.072       | $1.142 \pm 0.002$                                                                                           | $2.134 \pm 0.004$ | $3.59 \pm 0.01$   | $5.18 \pm 0.05$ |
| 5.107       | $1.278 \pm 0.003$                                                                                           | $1.992 \pm 0.005$ | $3.60 \pm 0.01$   | $5.89 \pm 0.05$ |
| 9.998       | $1.097 \pm 0.002$                                                                                           | $2.111 \pm 0.006$ | $3.71 \pm 0.02$   | $5.35 \pm 0.06$ |
